# Supplementary material
Source: Springer Nature journal article supplement (https://www.springermedizin.de/resource/supplementary/12889_2012_5404_MOESM1_ESM.pdf/9495310)

Geometric mean (95% confidence interval) days from HIV diagnosis to ART initiation

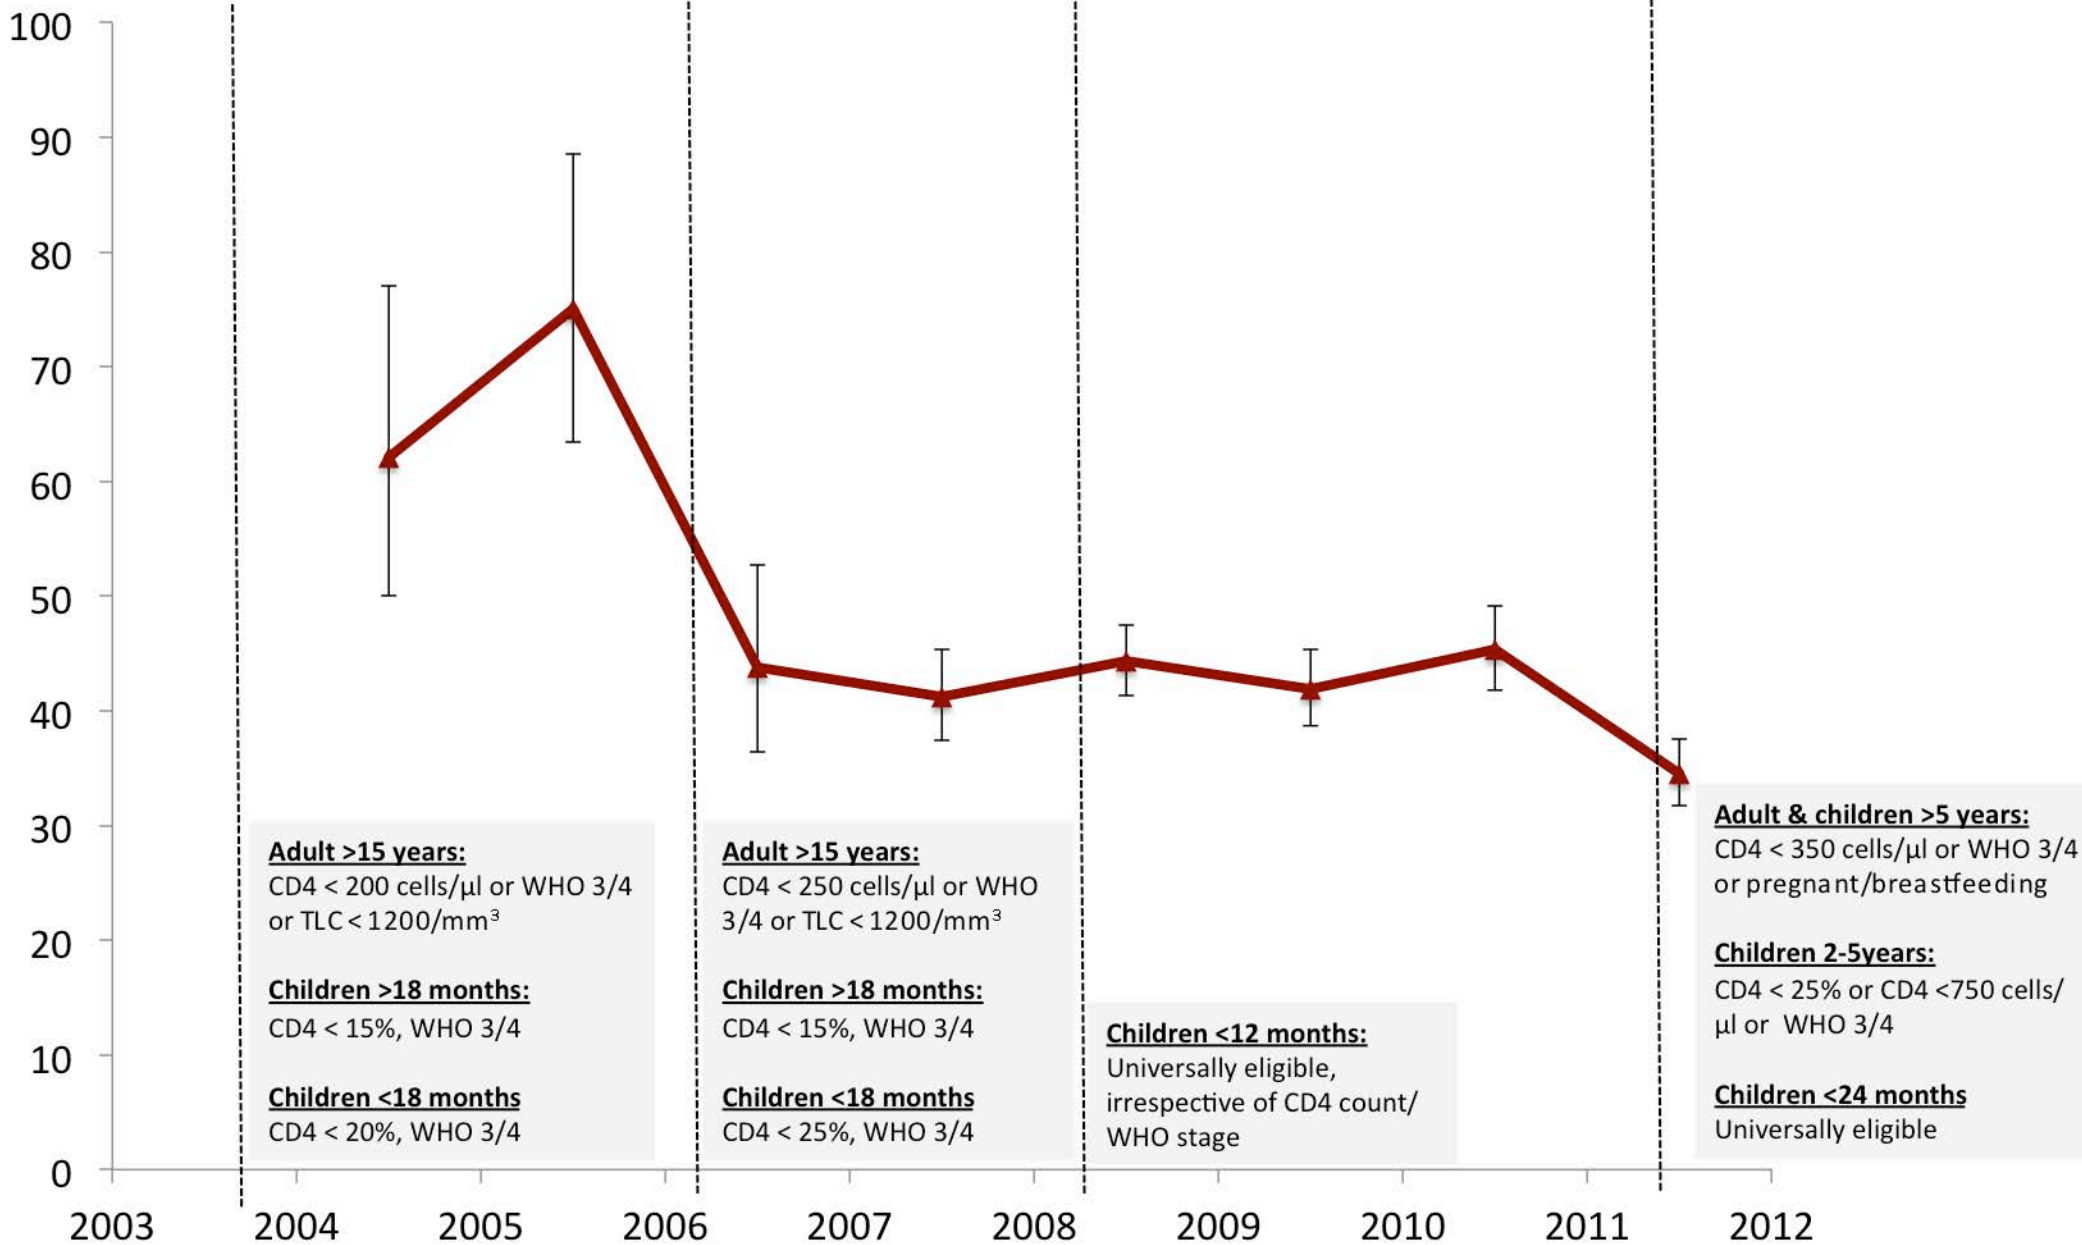

Supplement: MOESM1 [file 9495310]
